# Supplementary material for: DNA Methylation Profiling of Embryonic Stem Cell Differentiation into the Three Germ Layers
Source: PLoS One. 2011 Oct 7;6(10):e26052. doi: 10.1371/journal.pone.0026052 (PMC3189249; doi:10.1371/journal.pone.0026052)
Supplement: Table S1 — Primer sequences used in this study. (XLS) [file pone.0026052.s005.xls]

## Sheet: Table7
Table S1. Primer sequences used in this study.
oligo_name	Gene_Name	Strand	Primer_sequencePrimers 5'-3'	length
1700019N12Rik	1700019N12Rik	top	AGGTTGAGGTTGTTTTTAATAG	22
1700019N12Rik		top	CAACTCCCTAAATTCCTTAAC	21
2310014G06Rik-F	2310014G06Rik	bottom	GGTGGGGTATATTTAGTATTGA	22
2310014G06Rik-R		bottom	CTCTACCCTCCCTCACCTAC	20
4932412H11Rik-F	4932412H11Rik	bottom	GGGATAGAATGTAAATGTTAGAAG	24
4932412H11Rik-R		bottom	TCTAAAAACTACTAAACCCAAACT	24
Air_ICR-F	Air	top	GAAGTTGTATAAGGGTAGGGT	21
Air_ICR-R		top	ACTTAACATAACCAAAATCACA	22
Ankrd34b-F	Ankrd34b	top	TAGGAAGGTGAAGGATTATTG	21
Ankrd34b-R		top	CRTCCCCACACTAACAACTAC	21
Btbd12-F	Btbd12	bottom	AGAGAGAAGAGTTGTTGAGTTGT	23
Btbd12-R		bottom	AACTCCTCCATCACTTAACCT	21
Ccdc72-F	Ccdc72	bottom	GAGGGTGATTTTTTGTTTAGT	21
Ccdc72-R		bottom	TCCATCTCCTTAACCTACTTC	21
Cldn11-F	Cldn11	top	TAGGGAAGGTTTTGTTTAGG	20
Cldn11-R		top	CTACAAATCACCACCCAATC	20
Gm996-F	Gm996	top	GTTTGTGATGGTAATTTTTGG	21
Gm996-R		top	CAACATCCTAACTCCTAATCCT	22
Hnt_top-F	Hnt	top	TTGTTTTTTTTGTAAGTTTATTG	23
Hnt_top-R		top	ACTTCATACACATCCTTCACAC	22
Hoxd12-F	HoxD12	top	TTGAATATGGTAGTGTAAGTGGT	23
Hoxd12-R		top	ACAAACCTACAACAAAACCC	20
Igf2r_ICR-F	Igf2r	bottom	GTTGAAGAAGAGAGAGTTAGGA	22
Igf2r_ICR-R		bottom	TAACAACCCCAAAATTACTC	20
Lefty1-F	Lefty1	bottom	GTTTTGGTTGAATTTTTTGT	20
Lefty1-R		bottom	ACCATACCATTCCTATAACTCT	22
Lsm12-F	Lsm12	top	TAGAGTTAGTATTTTGGATTGGTAG	25
Lsm12-R		top	ATTCCTCTTTTATTTCCTCTTCT	23
Pcdha4-F	Pcdha4	top	GTGTTTGTTGAGGTTGTTGA	20
Pcdha4-R		top	CTCCTCATAATCCAAAAACTAC	22
Pcdhb4-F	Pcdhb4	top	TGGATTATGAGGTTTTGTAGG	21
Pcdhb4-R		top	ACAACTAAAATAACAACCAAACA	23
Pcdhga2-F	Pcdhga2	top	TGTGGAGGTGGAGGTAATAGA	21
Pcdhga2-R		top	ACTTAAACATTATATCCCTCATCC	24
Piwil2	Piwil2	top	ATGTTAATTTAAAAGGGTGGG	21
Piwil2		top	TACCTAAACAAAAAACTTCAAAAC	24
Plec1-F	Plec1	top	GGATTTTGTATGGTTTGTATATG	23
Plec1-R		top	AACCTTTACCTAATACCACTTCT	23
Rest-F	Rest	top	ATATGGAATTGGGAAGTTTG	20
Rest-R		top	TTCTCTACACTTTCCTCCACA	21
Rhox2-F	Rhox2	top	TTTTATTGTTTTGAGTTTTGTAG	23
Rhox2-R		top	ATCCTTATTCACTATTACACCC	22
Rhox4h-F	Rhox4h	top	GTAAGGAGTAGGATATTATTGTAGG	25
Rhox4h-R		top	ACACTTATATATCATCTCCAAAACT	25
Rhox6-F	Rhox6	top	TAGGGAAGAAGTTTATAGTTATTG	24
Rhox6-R		top	AACCTAAATATATATCTCTCTACTCC	26
Rhox9-F	Rhox9	top	TTAGGGATGTTTGGAAAGTT	20
Rhox9-R		top	AAAAACTCCTCAAAACAACC	20
Rnf186-F	Rnf186	top	TGTTTGAAGTTTTTGTTATATGTG	24
Rnf186-R		top	TTCTCCTATCCAATTAACTAACC	23
SFRP4-F	SFRP4	top	TTATTTGTATTATAGTATTTAGGAGA	26
SFRP4-R		top	CAAACCAAACTCTCTAACCA	20
Shd-F	Shd	top	GAYGAGTTGTAGAGTTAGGTATGA	24
Shd-R		top	TACAACCTCCACCTTAATCA	20
Tek-F	Tek	top	TTAGGGATTTATGTTTATTTGTG	23
Tek-R		top	CAAAAAAACAATATCAAAATCAC	23
Trim62-F	Trim62	bottom	ATGTTGGTTAGTTTGAGGTTG	21
Trim62-R		bottom	CTCCATCTACCTAAACATCTACC	23
