# Supplementary material for: DNA Methylation Profiling of Embryonic Stem Cell Differentiation into the Three Germ Layers
Source: PLoS One. 2011 Oct 7;6(10):e26052. doi: 10.1371/journal.pone.0026052 (PMC3189249; doi:10.1371/journal.pone.0026052)
Supplement: Table S2 — Gene Ontology (GO) terms associated with commonly methylated promoters in this study. (XLS) [file pone.0026052.s006.xls]

## Sheet: chart_8CFB5798529F1302352254971
Table.S2. Gene Ontology (GO) terms associated with commonly methylated promoters in this study
Category	GO	Term	Count	%	Benjamini	P-Value
GOTERM_BP_FAT	GO:0007156	homophilic cell adhesion	24	15.3846	1.18e-22	1.54e-25
GOTERM_BP_FAT	GO:0016337	cell-cell adhesion	24	15.3846	8.87e-16	2.32e-18
GOTERM_BP_FAT	GO:0007155	cell adhesion	24	15.3846	6.17e-08	2.42e-10
GOTERM_BP_FAT	GO:0022610	biological adhesion	24	15.3846	4.79e-08	2.51e-10
GOTERM_BP_FAT	GO:0019953	sexual reproduction	19	12.1795	5.71e-07	3.74e-09
GOTERM_BP_FAT	GO:0007283	spermatogenesis	16	10.2564	4.79e-07	3.76e-09
GOTERM_BP_FAT	GO:0048232	male gamete generation	16	10.2564	4.79e-07	3.76e-09
GOTERM_BP_FAT	GO:0007276	gamete generation	17	10.8974	1.97e-06	1.81e-08
GOTERM_BP_FAT	GO:0048609	reproductive process in a multicellular organism	18	11.5385	5.48e-06	5.74e-08
GOTERM_BP_FAT	GO:0032504	multicellular organism reproduction	18	11.5385	5.48e-06	5.74e-08
GOTERM_BP_FAT	GO:0051327	M phase of meiotic cell cycle	8	5.12821	0.000792	9.34e-06
GOTERM_BP_FAT	GO:0007126	meiosis	8	5.12821	0.000792	9.34e-06
GOTERM_BP_FAT	GO:0051321	meiotic cell cycle	8	5.12821	0.000827	1.08e-05
GOTERM_BP_FAT	GO:0048610	reproductive cellular process	10	6.41026	0.00109667	1.58e-05
GOTERM_BP_FAT	GO:0007281	germ cell development	8	5.12821	0.00147016	2.31e-05
GOTERM_BP_FAT	GO:0007127	meiosis I	5	3.20513	0.0121618	0.000208
GOTERM_BP_FAT	GO:0048477	oogenesis	5	3.20513	0.0172406	0.000319
GOTERM_BP_FAT	GO:0003006	reproductive developmental process	10	6.41026	0.0203034	0.000403
GOTERM_BP_FAT	GO:0000279	M phase	10	6.41026	0.0312593	0.000665
GOTERM_BP_FAT	GO:0007292	female gamete generation	5	3.20513	0.0556852	0.00127409
GOTERM_BP_FAT	GO:0022403	cell cycle phase	10	6.41026	0.0761127	0.00186341
GOTERM_BP_FAT	GO:0009566	fertilization	5	3.20513	0.127367	0.00338245
